# Supplementary material for: Microfluidic Co-Culture System for Synaptically Segregated Neural Networks to Explore Astrocyte-Driven Neural Pathology
Source: Research Square preprint supplement (doi:10.21203/rs.3.rs-7561462/v1), 2025-10-31
Supplement: Supplementary file 1 [file 0a858c234f9e0ad064801aa3.pdf]

## Supplementary Materials:

a

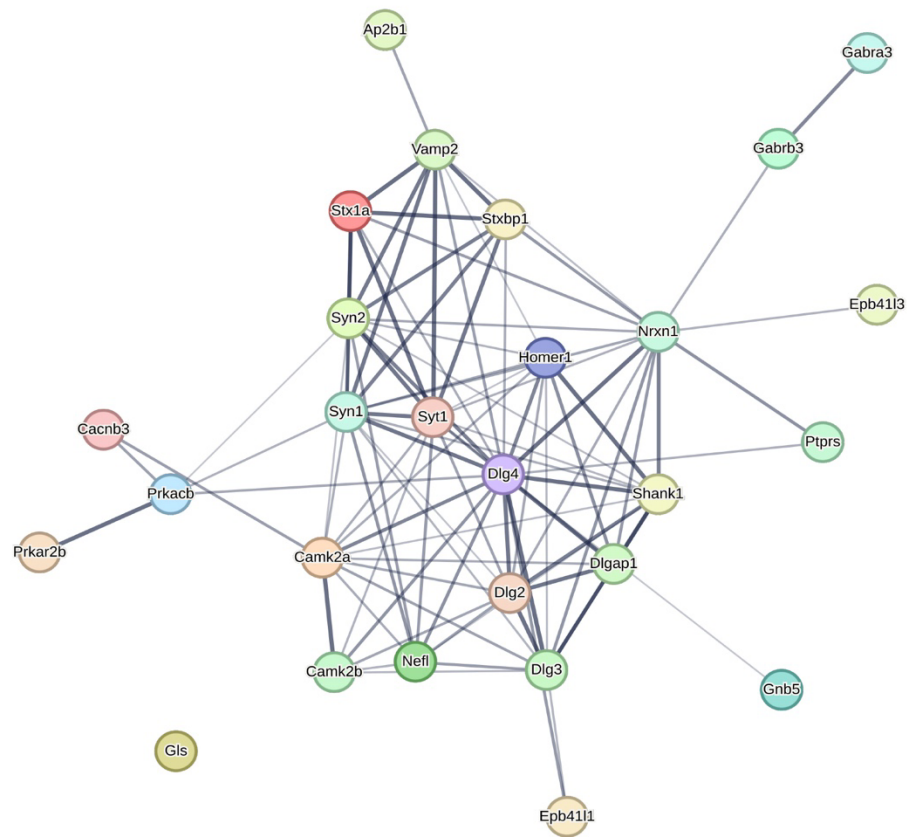

**b**

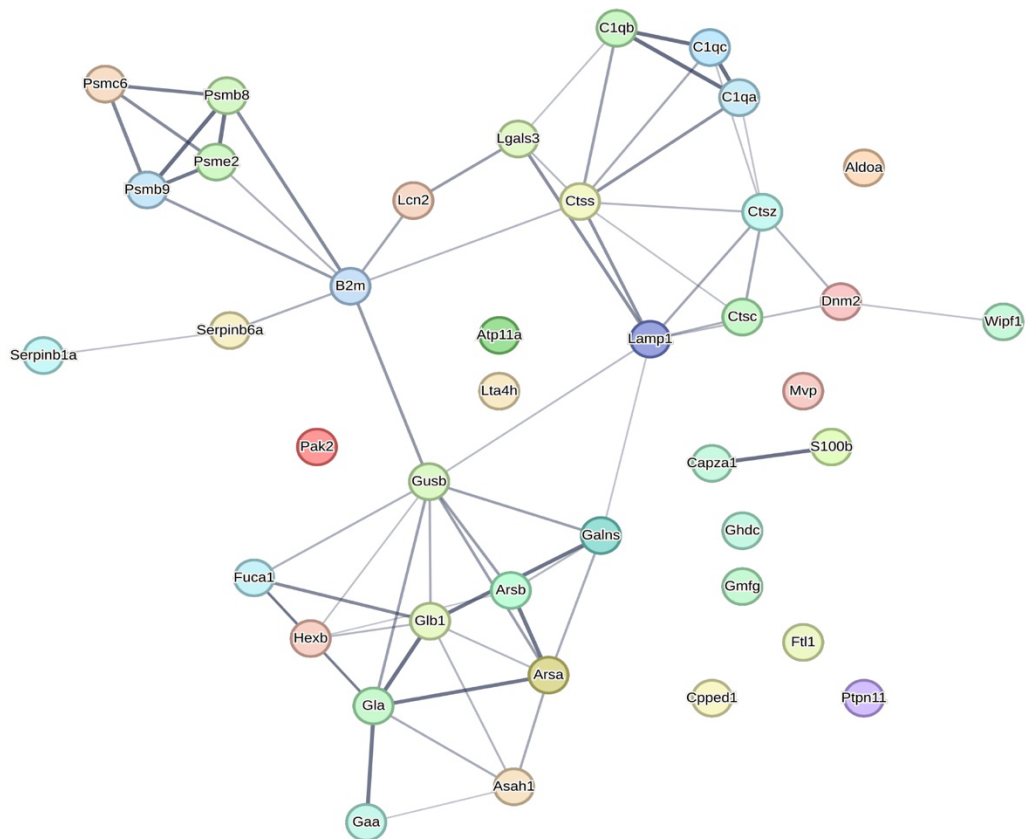

**Supplementary Fig. 1.** String analysis of the Reactome pathway of the cellular populations in different compartments of the microfluidic device.

- (a) STRING interaction network of significantly enhanced proteins expressed ( $-\log_{10}P$  value  $\geq 5$ ) in the co-culture compartments at 7 DIV that involved with neurotransmitter receptors, transmission across chemical synapse, and neuronal system.
- (b) STRING interaction network of significantly enhanced proteins expressed ( $-\log_{10}P$  value  $\geq 5$ ) in the astrocyte-only compartments at 7 DIV that involved in innate immune system and neutrophil degranulation.

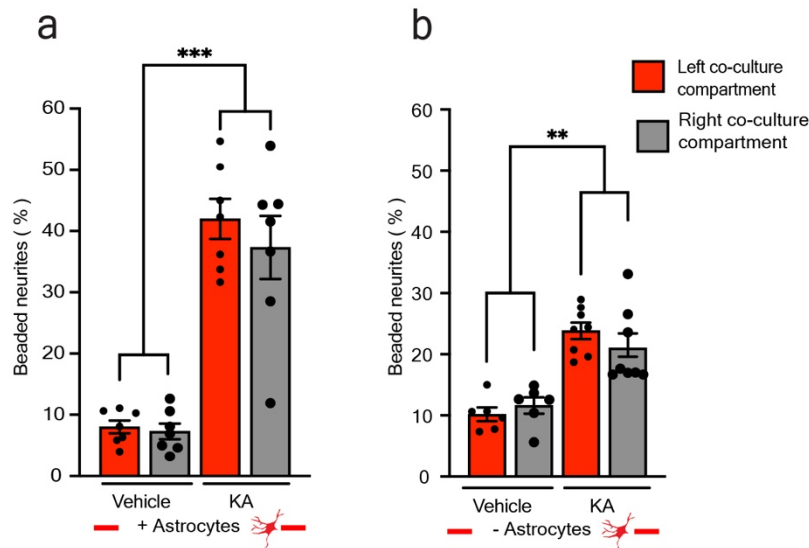

**Supplementary Fig. 2.** Kainic Acid (KA) treatment to the left co-culture compartment for 15 minutes caused a substantial loss of neurite integrity in neurons of the left and right co-culture compartments at 6 hours post-treatment in the presence of astrocytes.

- Percentage of beaded axons in a  $\text{mm}^2$  ROI in the left and right co-culture compartments at 6 hours, following a 15-minute KA treatment to the left co-culture compartment in the presence of astrocytes; \*\*\* $p < 0.001$ ; one-way ANOVA with Tukey's post hoc test. Values represent mean  $\pm$  SEM;  $n=3$ .
- Percentage of beaded axons in a  $\text{mm}^2$  ROI in the left and right co-culture compartments at 6 hours, following a 15-minute KA treatment to the left co-culture compartment in the absence of astrocytes; \*\* $p < 0.01$ ; one-way ANOVA with Tukey's post hoc test. Values represent mean  $\pm$  SEM;  $n=3$ .

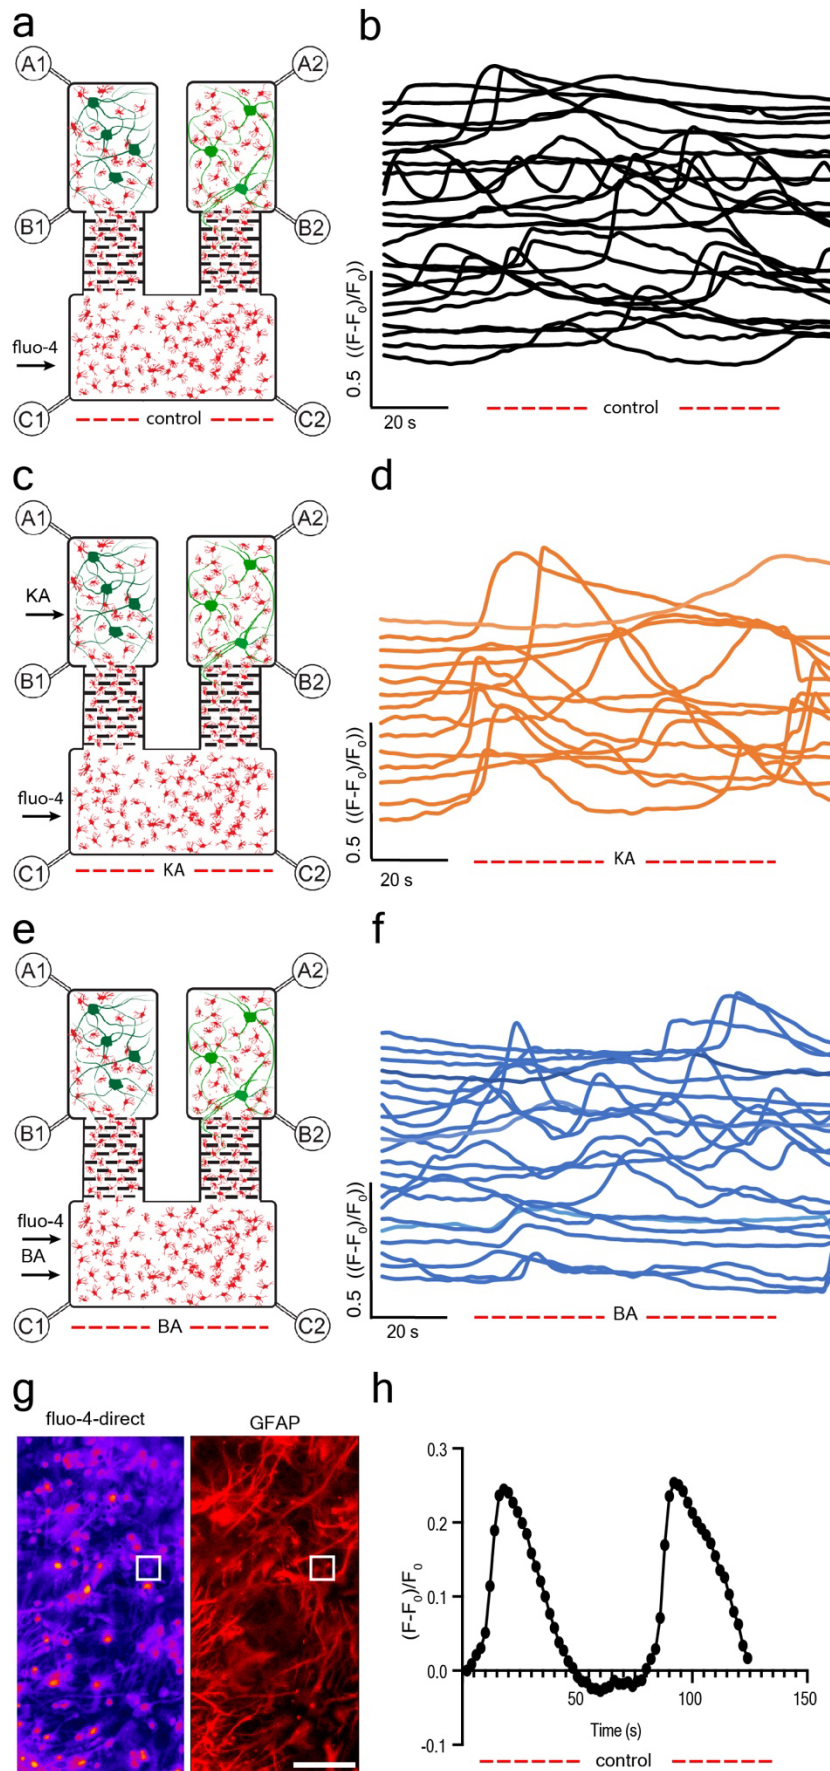

**Supplementary Fig. 3.** Effect of KA (1 mM) or BA (1  $\mu$ M) on intracellular free calcium in astrocytes, measured with fluo-4-direct.

- (a) Schematic diagram of microfluidic device populated with astrocytes and neurons. Arrows indicate addition of fluo-4-direct to the astrocyte-only compartment.
- (b) Changes in fluorescence intensity of fluo-4-direct ( $F-F_0/F_0$ ) over time, representing dynamic changes in free intracellular calcium levels in individual astrocytes of the astrocyte-only compartment.
- (c) Schematic diagram of microfluidic device populated with astrocytes and neurons. Arrows indicate addition of KA (1 mM) to the left co-culture compartment, and addition of fluo-4-direct to the astrocyte-only compartment.
- (d) Changes in fluorescence intensity of fluo-4-direct ( $F-F_0/F_0$ ) in response to the addition of KA (1 mM) to the left co-culture compartment.
- (e) Schematic diagram of microfluidic device populated with astrocytes and neurons. Arrows indicates addition of fluo-4-direct and subsequently BA, to the astrocyte-only compartment.
- (f) Changes in fluorescence intensity of fluo-4-direct ( $F-F_0/F_0$ ) in response to the addition of BA (1  $\mu$ M) to the astrocytes-only compartment.
- (g) Fluo-4-direct in live untreated astrocytes, and GFAP immunolabelling of the same astrocyte-only compartment. White box indicates ROI around an individual astrocyte soma. Scale bar = 20  $\mu$ m.
- (h) Dynamic changes in free intracellular calcium over time in the single untreated astrocyte soma from the ROI outlined in (g).

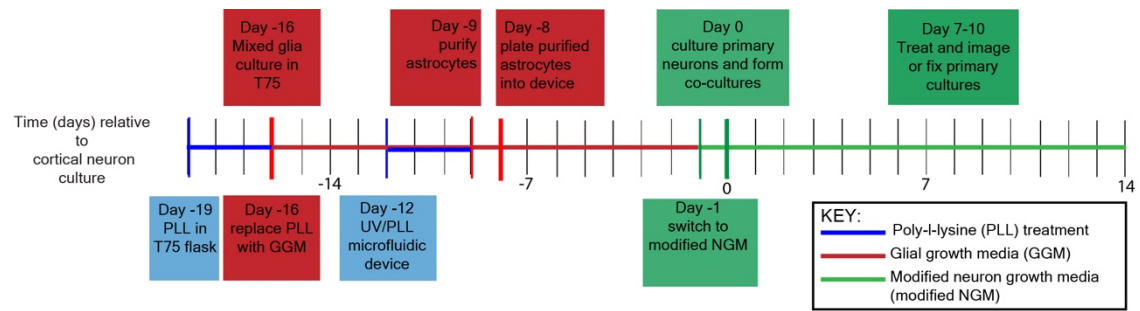

**Supplementary Fig. 4.** Timeline in days, for the preparation of the microfluidic device, the derivation, culture and plating of primary astrocytes and neurons, and maintenance of co-cultures in this microfluidic device.

**Table S1:** Proteins significantly ( $-\log_{10}P$  value  $\geq 5$ ) enriched in the astrocyte-only compartments identified via DAVID Reactome pathway analysis. Proteins are clustered by function in the innate immune system and neutrophil granulation.

| Innate immune system |           | Neutrophil degranulation |        |
|----------------------|-----------|--------------------------|--------|
| Asah1                | Hexb      | Fuca1                    | Ctss   |
| Ftl1                 | Serpbin1a | Ctsz                     | Lamp1  |
| Lta4h                | Lgals3    | Lcn2                     | Lta4h  |
| Gaa                  | Gusb      | Atp11a                   | Gmfg   |
| Gmfg                 | Psmc6     | Asah1                    | Lgals3 |
| Atp11a               | Cpped1    | Serpinb1a                | hexb   |
| Psmb9                | C1qb      | Aldoa                    | Ctss   |
| C1qa                 | Serpinb6a | Gla                      | Lamp1  |
| C1qc                 | Psmb8     | Gusb                     | Lta4h  |
| C1qb                 | Arsa      | Gaa                      | Gmfg   |
| Lamp1                | Ctsz      | Serpinb6a                | Arsb   |
| B2m                  | Ptpn11    | Cpped1                   | Galns  |
| Wipf1                | Psme2     | Mvp                      | B2m    |
| S100b                | Mvp       | Glb1                     | Ctsc   |
| Lcn2                 | Aldoa     | Lgals3                   | Arsa   |
| Glb1                 | Ghdc      | hexb                     | Ghdc   |
| Arsb                 | Fuca1     |                          |        |
| Pak2                 | Ctss      |                          |        |
| Capza1               | Ctsc      |                          |        |
| Gla                  | Dnm2      |                          |        |

**Table S2:** Proteins significantly ( $-\log_{10}P$  value  $\geq 5$ ) enriched in the co-culture compartments identified via DAVID Reactome pathway analysis. Proteins are clustered by involvement in neuronal system, the chemical synapse, and the Neurotransmitter Receptor.

| Nervous System | Synaptic transmission | Post-synaptic receptors |
|----------------|-----------------------|-------------------------|
| Stx1a          | Gnb5                  | Dlg2                    |
| Dlg3           | Stx1a                 | Camk2a                  |
| Dlgap1         | Camk2a                | Gabra3                  |
| Gabrb3         | Nefl                  | Prkar2b                 |
| Camk2a         | Vamp2                 | Dlg4                    |
| Gabra3         | Epb4111               | Epb4114                 |
| Vamp2          | Prkacb                | Dlg3                    |
| Syn1           | Syt1                  | Gabrb3                  |
| Ep4113         | Camk2b                | Ap2b1                   |
| Ap2b1          | Prkar2b               | Mef2c                   |
| Gnb5           | Syn2                  | Prkacb                  |
| Dlg4           | Cacnb3                | Gnb5                    |
| Prkacb         | Syn1                  | Nefl                    |
| Dlg2           | Dlg4                  | Camk2b                  |
| Nrxn1          | Ap2b1                 |                         |
| Epb4111        | Gabra3                |                         |
| Ptpns          | Dlg3                  |                         |
| Homer1         | Stx1bp1               |                         |
| Camk2b         | Gls                   |                         |
| Prkar2b        | Dlg2                  |                         |
| Stxbp1         | Gabrb3                |                         |
| Gls            |                       |                         |
| Syn2           |                       |                         |
| Syt1           |                       |                         |
| Shank1         |                       |                         |
| Cacb3          |                       |                         |
| Nefl           |                       |                         |
